# Supplementary material for: Recombinant Domain of Flagellin Promotes In Vitro a Chemotactic Inflammatory Profile in Human Immune Cells Independently of a Dendritic Cell Phenotype
Source: MDPI journal article supplement (doi:10.3390/molecules28052394), 2023-03-05
Supplement: s1 [file s1]

## Supplementary Materials

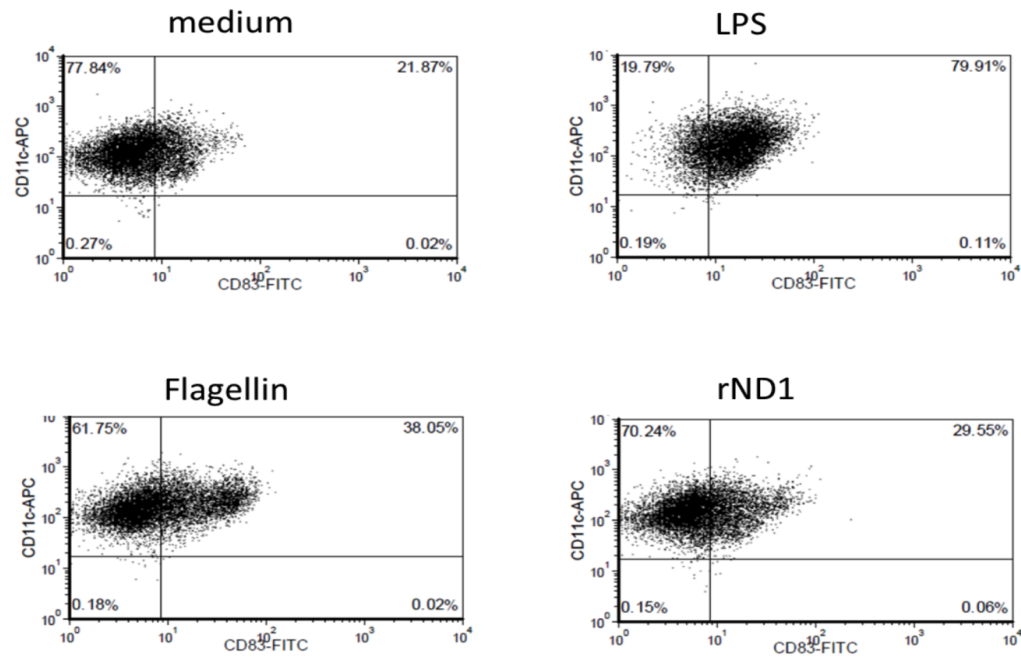

**Figure S1.** Flow cytometry analysis for CD83. Dot plot shows the distribution and percentage of cells expressing CD83 within the gate CD11c positive for iDC (only medium), mDC (LPS), and MoDC treated with FLA, and rND1. The dot plot show a representative experiment. LPS: lipopolysaccharide from *E. coli* K12 strain (1 µg/mL), FLA: Flagellin from *S. typhimurim* (100 ng/mL), rND1: recombinant amino terminus of the D1 domain of *V. anguillarum* flagellin (5 µg/mL).

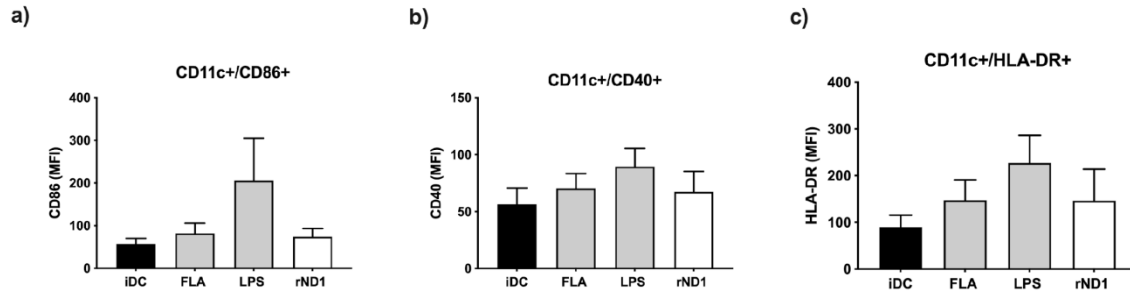

**Figure S2.** Expression of costimulatory and HLA-DR molecules in MoDCs treated with rND1. The bar graphs show the median fluorescence intensity of CD86 (a), CD40 (b) and HLA-DR (c) on the surface of CD11c positive cells after treatment with FLA and rND1. As controls MoDCs were cultured in presence of LPS for mDC and only culture medium for iDC. The values represent the means of three independent experiments. iDC: immature dendritic cell; LPS: lipopolysaccharide (1 µg/mL), FLA: Flagellin from *S. typhimurim* (100 ng/mL), rND1: recombinant amino terminus of the D1 domain of *V. anguillarum* flagellin (5 µg/mL).

**Table S1.** Cytokines expression between blood donors

| Treatment 3h |         |    | rND1 1 µg/ml<br>Fold change |       |       |       |
|--------------|---------|----|-----------------------------|-------|-------|-------|
| Gender       | AB<br>O | Rh | IL-8                        | IL-1β | TNF-α |       |
| *Female      | ●       | A  | +                           | 7.1   | 15.5  | 7.1   |
| Female       | ●       | O  | +                           | 15.9  | 338.5 | 16.1  |
| Male         | ●       | A  | +                           | 13.4  | 67.1  | 18.1  |
| Male         | ●       | O  | +                           | 5.9   | 29.8  | 12.4  |
| Male         | ●       | O  | -                           | 7.3   | 18.6  | 12.2  |
| Male         | ●       | O  | +                           | 27.8  | 225.1 | 59.9  |
| Male         | ●       | B  | -                           | 17.1  | 99.9  | 121.6 |

\* rND1 0.5 ug/ml

**Table S2.** Mean and confidence intervals (95% CI) of soluble proteins secreted by THP-1 cells after stimulation with rND1.

| Soluble Protein | Control         |       | FLA (50 ng/ml)  |       | LPS (1 µg/ml)   |       | rND1 (1 µg/ml)  |       | Significance<br><i>P-value</i> |
|-----------------|-----------------|-------|-----------------|-------|-----------------|-------|-----------------|-------|--------------------------------|
|                 | mean<br>(pg/ml) | 95%CI | mean<br>(pg/ml) | 95%CI | mean<br>(pg/ml) | 95%CI | mean<br>(pg/ml) | 95%CI |                                |
| EGF             | nd              | und   | 31.25           | 1.94  | 8.80            | 3.30  | nd              | und   | ns                             |
| Eotaxin         | nd              | und   | 15.96           | 6.40  | 3.56            | 1.32  | nd              | und   | ns                             |
| G-CSF           | nd              | und   | 11.72           | 11.48 | nd              | und   | nd              | und   | ns                             |
| GM-CSF          | 0.18            | 0.06  | 2.18            | 0.75  | 0.68            | 0.34  | 0.14            | 0.07  | ns                             |
| IFNα2           | nd              | und   | 6.04            | 3.86  | 1.45            | 2.83  | nd              | und   | ns                             |
| IFNγ            | nd              | und   | 1.30            | 1.08  | 0.03            | 0.06  | nd              | und   | ns                             |
| IL-10           | 0.003           | 0.004 | 2.77            | 1.86  | 0.35            | 0.39  | 0.003           | 0.005 | ns                             |
| IL-12p40        | nd              | und   | 3.66            | 3.00  | 0.002           | 0.003 | nd              | und   | ns                             |

|                                 |       |       |          |         |         |         |       |       |    |
|---------------------------------|-------|-------|----------|---------|---------|---------|-------|-------|----|
| <b>IL-12p70</b>                 | nd    | und   | 0.40     | 0.32    | nd      | und     | nd    | und   | ns |
| <b>IL-13</b>                    | nd    | und   | 1.13     | 0.36    | 0.09    | 0.12    | nd    | und   | ns |
| <b>IL-15</b>                    | 0.01  | 0.01  | 0.94     | 0.11    | 0.17    | 0.11    | 0.01  | 0.01  | ns |
| <b>IL-17</b>                    | 0.04  | 0.04  | 1.22     | 0.59    | 0.09    | 0.17    | 0.01  | 0.01  | ns |
| <b>IL-1ra</b>                   | 15.50 | 8.58  | 79.76    | 3.09    | 56.63   | 34.00   | 11.74 | 1.70  | ns |
| <b>IL-1<math>\alpha</math></b>  | 0.15  | 0.02  | 1.64     | 0.94    | 0.57    | 0.46    | 0.12  | 0.04  | ns |
| <b>IL-1<math>\beta</math></b>   | 0.22  | 0.16  | 149.84   | 94.08   | 49.91   | 16.64   | 1.11  | 1.72  | ns |
| <b>IL-2</b>                     | 0.08  | 0.03  | 0.69     | 0.23    | 0.16    | 0.09    | 0.07  | 0.02  | ns |
| <b>IL-3</b>                     | 0.01  | 0.01  | 0.02     | 0.02    | 0.01    | 0.01    | 0.002 | 0.002 | ns |
| <b>IL-4</b>                     | 0.18  | 0.28  | 7.33     | 4.49    | 1.62    | 0.67    | 0.05  | 0.05  | ns |
| <b>IL-5</b>                     | 0.02  | 0.01  | 0.23     | 0.13    | 0.05    | 0.03    | 0.02  | und   | ns |
| <b>IL-6</b>                     | 0.06  | 0.01  | 1.55     | 2.13    | 0.22    | 0.17    | 0.08  | 0.07  | ns |
| <b>IL-7</b>                     | 0.04  | 0.06  | 4.43     | 1.36    | 1.36    | 1.03    | 0.003 | 0.01  | ns |
| <b>IL-8</b>                     | 7.65  | 9.39  | 741.00   | 415.42  | 122.69  | 94.18   | 24.05 | 35.69 | ns |
| <b>IP-10</b>                    | 0.52  | 0.83  | 215.12   | 155.80  | 167.87  | 126.70  | 1.03  | 1.08  | ns |
| <b>MCP1</b>                     | 20.36 | 28.09 | 151.00   | 22.09   | 87.31   | 26.26   | 25.42 | 42.70 | ns |
| <b>MIP-1<math>\alpha</math></b> | 4.49  | 22.10 | 739.00   | 543.68  | 187.00  | 67.41   | 14.06 | 19.04 | ns |
| <b>MIP-1<math>\beta</math></b>  | 27.46 | 38.10 | 31107.97 | 8787.47 | 2061.33 | 1468.80 | 62.26 | 87.16 | ns |
| <b>TNF-<math>\alpha</math></b>  | 12.73 | 6.60  | 4638.00  | 1444.08 | 808.33  | 481.76  | 21.94 | 8.44  | ns |
| <b>TNF-<math>\beta</math></b>   | 0.19  | 0.09  | 1.40     | 0.45    | 0.36    | 0.23    | 0.18  | 0.07  | ns |
| <b>VEGF</b>                     | 5.90  | 6.61  | 41.70    | 7.10    | 19.59   | 6.68    | 5.19  | 7.34  | ns |

nd: not detectable, und: Undetermined, ns: not significant

**Table S3.** Mean and confidence intervals (95% CI) of soluble proteins secreted by Mo cells after stimulation with rND1.

| Soluble Protein                | Control         |       | FLA (50 ng/ml)  |       | LPS (1 $\mu$ g/ml) |       | rND1 (1 $\mu$ g/ml) |       | Significance<br><i>p-value</i> |
|--------------------------------|-----------------|-------|-----------------|-------|--------------------|-------|---------------------|-------|--------------------------------|
|                                | mean<br>(pg/ml) | 95%CI | mean<br>(pg/ml) | 95%CI | mean<br>(pg/ml)    | 95%CI | mean<br>(pg/ml)     | 95%CI |                                |
| <b>EGF</b>                     | nd              | und   | 2.51            | 2.83  | 7.39               | 14.48 | 22.39               | 20.58 | ns                             |
| <b>Eotaxin</b>                 | 1.16            | 1.49  | 8.76            | 4.32  | 12.72              | 11.69 | 17.27               | 10.73 | 0,038                          |
| <b>G-CSF</b>                   | nd              | und   | nd              | und   | 12.91              | 25.31 | 10.15               | 19.90 | ns                             |
| <b>GM-CSF</b>                  | 0.53            | 0.58  | 1.68            | 1.39  | 1.39               | 1.94  | 3.27                | 2.93  | ns                             |
| <b>IFN<math>\alpha</math>2</b> | nd              | und   | 0.01            | 0.02  | 1.61               | 3.15  | 1.75                | 1.99  | ns                             |
| <b>IFN<math>\gamma</math></b>  | 0.30            | 0.46  | 0.95            | 0.62  | 2.00               | 3.93  | 2.57                | 3.03  | ns                             |
| <b>IL-10</b>                   | 0.38            | 0.48  | 4.86            | 4.41  | 12.11              | 15.36 | 25.76               | 27.30 | ns                             |
| <b>IL-12p40</b>                | nd              | und   | 3.41            | 4.33  | 1.89               | 2.04  | 7.62                | 8.68  | ns                             |
| <b>IL-12p70</b>                | nd              | und   | 0.09            | 0.17  | 1.70               | 3.34  | 0.55                | 0.63  | ns                             |
| <b>IL-13</b>                   | 0.08            | 0.11  | 0.28            | 0.22  | 0.17               | 0.33  | 0.86                | 0.97  | ns                             |
| <b>IL-15</b>                   | 0.29            | 0.25  | 0.64            | 0.37  | 0.41               | 0.66  | 1.13                | 1.26  | ns                             |
| <b>IL-17</b>                   | 0.47            | 0.36  | 1.03            | 0.62  | 0.52               | 0.47  | 1.22                | 1.04  | ns                             |
| <b>IL-1ra</b>                  | 7.37            | 14.29 | 12.47           | 16.57 | 12.72              | 21.31 | 21.61               | 26.61 | ns                             |
| <b>IL-1<math>\alpha</math></b> | 0.62            | 0.48  | 1.26            | 0.97  | 0.92               | 1.05  | 2.02                | 1.90  | ns                             |
| <b>IL-1<math>\beta</math></b>  | 0.48            | 0.44  | 3.98            | 1.41  | 6.53               | 4.59  | 13.69               | 11.50 | ns                             |
| <b>IL-2</b>                    | 1.37            | 2.29  | 1.99            | 3.02  | 0.48               | 0.08  | 2.88                | 3.33  | ns                             |
| <b>IL-3</b>                    | 0.02            | 0.02  | 0.34            | 0.60  | 0.01               | 0.03  | 0.90                | 1.70  | ns                             |
| <b>IL-4</b>                    | 1.14            | 1.23  | 1.83            | 1.43  | 5.15               | 9.81  | 4.45                | 5.01  | ns                             |

|                                 |        |        |        |        |        |         |          |          |       |
|---------------------------------|--------|--------|--------|--------|--------|---------|----------|----------|-------|
| <b>IL-5</b>                     | 0.05   | 0.04   | 0.19   | 0.15   | 0.13   | 0.13    | 0.27     | 0.27     | ns    |
| <b>IL-6</b>                     | 0.20   | 0.12   | 21.50  | 14.45  | 42.40  | 11.17   | 89.91    | 78.04    | ns    |
| <b>IL-7</b>                     | 0.03   | 0.06   | 0.14   | 0.17   | 1.33   | 2.60    | 2.26     | 3.20     | ns    |
| <b>IL-8</b>                     | 87.91  | 78.55  | 662.25 | 274.41 | 747.00 | 444.91  | 1188.66  | 927.72   | 0,037 |
| <b>IP-10</b>                    | 337.75 | 209.93 | 350.25 | 162.45 | 153.00 | 7.84    | 445.25   | 347.01   | ns    |
| <b>MCP1</b>                     | 89.80  | 128.29 | 291.76 | 447.82 | 40.49  | 5.69    | 529.78   | 898.21   | ns    |
| <b>MIP-1<math>\alpha</math></b> | 9.79   | 2.85   | 136.37 | 85.33  | 301.00 | 223.44  | 2063.00  | 3243.19  | 0,046 |
| <b>MIP-1<math>\beta</math></b>  | 62.95  | 29.28  | 417.50 | 237.46 | 967.50 | 1082.88 | 9493.25  | 16091.40 | ns    |
| <b>TNF-<math>\alpha</math></b>  | 9.56   | 7.45   | 245.04 | 181.61 | 673.50 | 600.73  | 11030.00 | 19190.34 | ns    |
| <b>TNF-<math>\beta</math></b>   | 0.51   | 0.36   | 0.80   | 0.30   | 1.02   | 1.28    | 1.37     | 1.28     | ns    |
| <b>VEGF</b>                     | 0.52   | 0.76   | 3.70   | 4.15   | 8.70   | 17.05   | 23.45    | 22.39    | ns    |

nd: not detectable, und: Undetermined, ns: not significant

**Table S4:** Soluble protein in the cell culture medium supplemented with 1% FBS

| Soluble Protein                 | pg/ml  |            |           |         |                      |
|---------------------------------|--------|------------|-----------|---------|----------------------|
| <b>EGF</b>                      | 2.4408 | Chi=1.68%  | CV=0.29%  | R2=1.00 | DC=(2.66, 11891.81)  |
| <b>Eotaxin</b>                  | 1.3786 | Chi=0.095% | CV=0.019% | R2=1.00 | DC=(0.57, 741999.00) |
| <b>G-CSF</b>                    | 1.2419 | Chi=2.44%  | CV=0.39%  | R2=1.00 | DC=(1.72, 9921.64)   |
| <b>GM-CSF</b>                   | 0.2907 | Chi=7.41%  | CV=0.78%  | R2=1.00 | DC=(0.94, 7776.03)   |
| <b>IFN<math>\alpha</math>2</b>  | 0.5228 | Chi=1.50%  | CV=0.34%  | R2=1.00 | DC=(0.94, 16235.99)  |
| <b>IFN<math>\gamma</math></b>   | 0.8716 | Chi=0.99%  | CV=0.14%  | R2=1.00 | DC=(1.18, 10511.18)  |
| <b>IL-10</b>                    | 1.2473 | Chi=3.11%  | CV=0.50%  | R2=1.00 | DC=(1.94, 9797.91)   |
| <b>IL-12p40</b>                 | 0.6832 | Chi=0.13%  | CV=0.021% | R2=1.00 | DC=(0.18, 387857.07) |
| <b>IL-12p70</b>                 | 1.0698 | Chi=5.09%  | CV=0.67%  | R2=1.00 | DC=(1.72, 8462.08)   |
| <b>IL-13</b>                    | 0.8249 | Chi=1.10%  | CV=0.19%  | R2=1.00 | DC=(1.06, 22040.55)  |
| <b>IL-15</b>                    | 0.6199 | Chi=1.60%  | CV=0.23%  | R2=1.00 | DC=(0.99, 9732.67)   |
| <b>IL-17</b>                    | 0.6639 | Chi=3.59%  | CV=0.44%  | R2=1.00 | DC=(0.78, 8385.02)   |
| <b>IL-1ra</b>                   | 1.82   | Chi=1.04%  | CV=0.17%  | R2=1.00 | DC=(1.82, 10658.21)  |
| <b>IL-1<math>\alpha</math></b>  | 0.589  | Chi=1.79%  | CV=0.25%  | R2=1.00 | DC=(1.15, 15603.51)  |
| <b>IL-1<math>\beta</math></b>   | 0.0821 | Chi=11.25% | CV=2.15%  | R2=1.00 | DC=(0.54, 8578.90)   |
| <b>IL-2</b>                     | 0.1237 | Chi=6.36%  | CV=0.81%  | R2=1.00 | DC=(0.63, 8619.87)   |
| <b>IL-3</b>                     | 0      | Chi=13.99% | CV=1.19%  | R2=1.00 | DC=(0.42, 7526.05)   |
| <b>IL-4</b>                     | 1.5518 | Chi=11.83% | CV=2.04%  | R2=1.00 | DC=(2.19, 10238.53)  |
| <b>IL-5</b>                     | 0.1522 | Chi=7.29%  | CV=0.80%  | R2=1.00 | DC=(0.68, 7821.41)   |
| <b>IL-6</b>                     | 0.2718 | Chi=9.79%  | CV=1.47%  | R2=1.00 | DC=(0.80, 9239.01)   |
| <b>IL-7</b>                     | 1.3614 | Chi=0.88%  | CV=0.13%  | R2=1.00 | DC=(1.95, 19072.54)  |
| <b>IL-8</b>                     | 0.0178 | Chi=8.69%  | CV=2.15%  | R2=1.00 | DC=(0.25, 8285.78)   |
| <b>IP-10</b>                    | 1.1995 | Chi=2.90%  | CV=0.59%  | R2=1.00 | DC=(2.03, 11490.07)  |
| <b>MCP1</b>                     | 1.8974 | Chi=1.19%  | CV=0.26%  | R2=1.00 | DC=(2.32, 11567.25)  |
| <b>MIP-1<math>\alpha</math></b> | 1.6407 | Chi=25.10% | CV=1.74%  | R2=1.00 | DC=(2.17, 7107.40)   |
| <b>MIP-1<math>\beta</math></b>  | 0      | Chi=13.45% | CV=2.39%  | R2=1.00 | DC=(0.40, 7714.80)   |
| <b>TNF-<math>\alpha</math></b>  | 0.3826 | Chi=3.23%  | CV=0.44%  | R2=1.00 | DC=(1.09, 8588.99)   |
| <b>TNF-<math>\beta</math></b>   | 0.3034 | Chi=8.75%  | CV=2.26%  | R2=1.00 | DC=(0.98, 8303.73)   |

|             |        |           |          |         |                     |
|-------------|--------|-----------|----------|---------|---------------------|
| <b>VEGF</b> | 3.1891 | Chi=2.98% | CV=0.70% | R2=1.00 | DC=(2.94, 10043.08) |
|-------------|--------|-----------|----------|---------|---------------------|

**Table S5.** Primer and sequences used for gene expression analysis by quantitative real time PCR.

| <b>Gene</b>   | <b>name</b>                              | <b>Sequence 5'-3'</b>                                  | <b>Accession no.</b> |
|---------------|------------------------------------------|--------------------------------------------------------|----------------------|
| IL-8          | Interleukin 8                            | F AGACAGCAGAGCACACAAGC<br>R ATGGTTCCTCCGGTGGT          | AF385628.2           |
| IL-1 $\beta$  | Interleukin 1 $\beta$                    | F GTGGCAATGAGGATGACTTGTTTC<br>R TAGTGGTGGTCGGAGATTCGTA | NM_000576.3          |
| TNF- $\alpha$ | Tumor necrosis factor $\alpha$           | F TCTTCTCGAACCCCGAGTGA<br>R CCTCTGATGGCACCACCAG        | NM_000594.4          |
| GAPDH         | Glyceraldehyde-3-phosphate dehydrogenase | F AAGGTGAAGGTCGGAGTCAA<br>R AATGAAGGGGTCATTGATGG       | NM_002046.7          |
| B-actin       | Actin $\beta$                            | F GCACAGAGCCTCGCCTT<br>R GTTGTCGACGACGAGCG             | NM_001101.5          |
